# Supplementary material for: The Effects of Sodium–Glucose Cotransporter 2 Inhibitors on Body Composition in Type 2 Diabetes Mellitus: A Narrative Review
Source: Springer Nature journal article supplement (doi:10.1007/s13300-023-01481-7), 2023-10-14
Supplement: MOESM1 [file 26181042]

## Supplementary Material

### **The effects of sodium-glucose cotransporter 2 inhibitors on body composition in type 2 diabetes mellitus: A narrative review**

Soodeh Jahangiri <sup>a</sup>, Mojtaba Malek <sup>b</sup>, Sanjay Kalra <sup>c,d</sup>, Mohammad E. Khamseh <sup>a,\*</sup>

<sup>a</sup> Endocrine Research Center, Institute of Endocrinology and Metabolism, Iran University of Medical Sciences, Tehran, Iran

<sup>b</sup> Research center for Prevention of Cardiovascular Disease, Institute of Endocrinology & Metabolism, Iran University of Medical Sciences, Tehran, Iran

<sup>c</sup> Department of Endocrinology, Bharti Hospital, Karnal, India

<sup>d</sup> University Center for Research & Development, Chandigarh University, Mohali, India

**\*Corresponding author:** Mohammad E. Khamseh, Endocrine Research Center, Institute of Endocrinology and Metabolism, Iran University of Medical Sciences, Tehran, Iran

Email address: [khamseh.m@iums.ac.ir](mailto:khamseh.m@iums.ac.ir)

**Figure S1.** Sodium glucose cotransporter 2 inhibitor versus comparators: Between-Group Mean Difference of Changes in Total Body Weight (BW) and Fat-Free Mass (FFM)

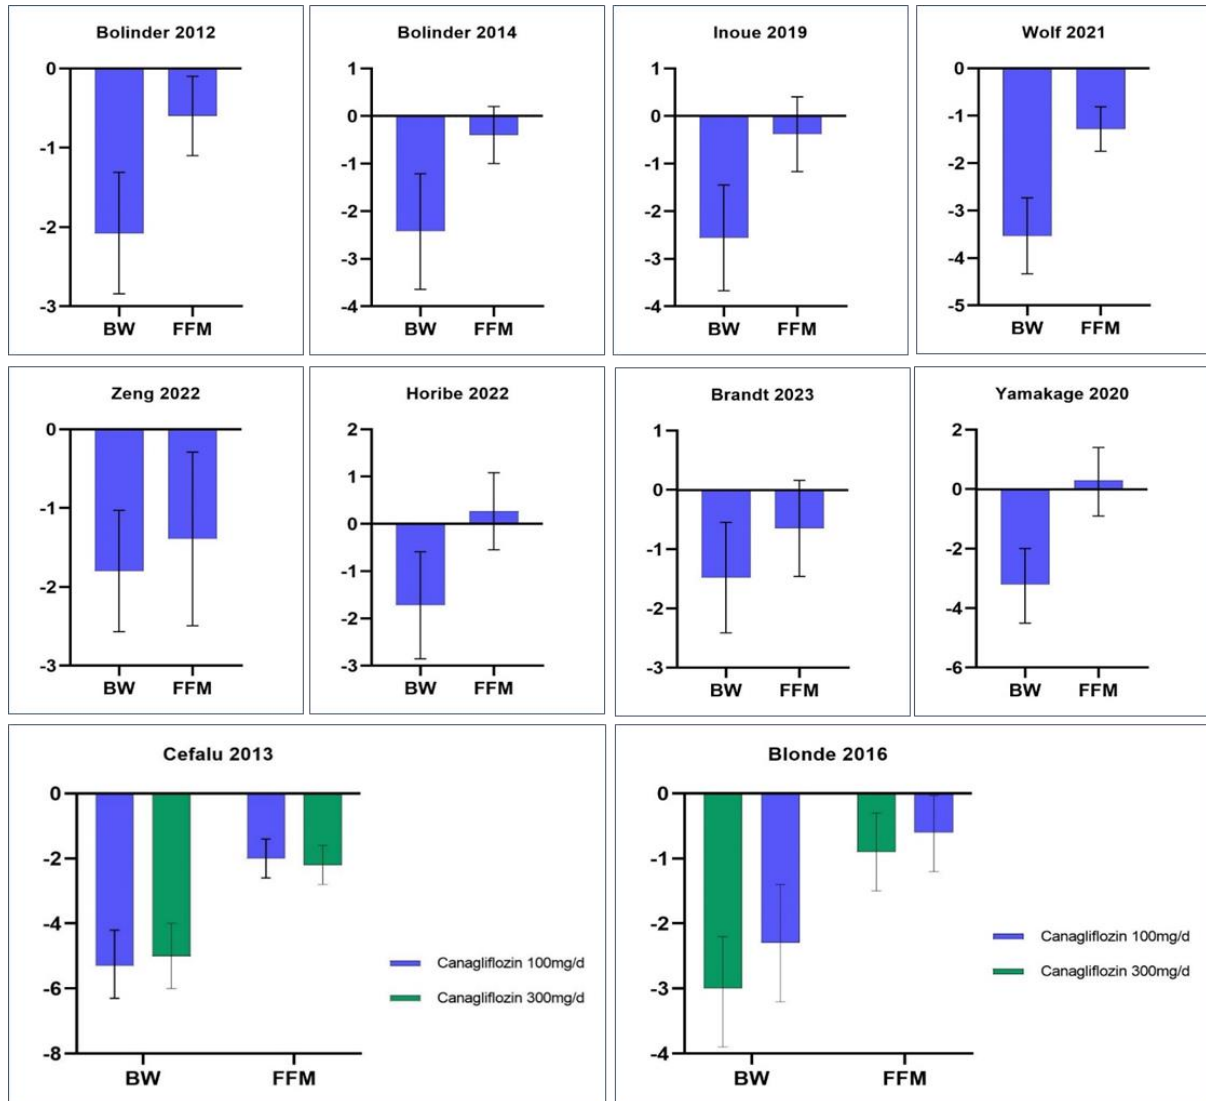

**Table S1.** Quality of Included Studies Based on National Institute of Health (NIH) Assessment Tool

| Study                    | Were the study described as randomized, a randomized trial, a randomized clinical trial, or an RCT? | Were the method of randomization adequate (i.e., use of randomly generated assignment)? | Were the treatment allocation concealed (so that assignments could not be predicted)? | Were study participants and providers blinded to treatment group assignment? | Were the people assessing the outcomes blinded to the participants' group assignments? | The groups similar at baseline on important characteristics that could affect outcomes? | The overall drop-out rate from the study at endpoint 20% or lower of the number allocated to treatment? | The differential drop-out rate (between treatment groups) at endpoint 15 percentage points or lower? | Was there high adherence to the intervention protocols for each treatment group? | Were other interventions avoided or similar in the groups (e.g., similar background treatments)? | Were outcomes assessed using valid and reliable measures, implemented consistently across all study participants? | Did the authors report that the sample size was sufficiently large to be able to detect a difference in the main outcome between groups with at least 80% power? | Were outcomes reported or subgroups analyzed prespecified (i.e., identified before analyses were conducted)? | Were all randomized participants analyzed in the group to which they were originally assigned, i.e., did they use an intention-to-treat analysis? | Rating |
|--------------------------|-----------------------------------------------------------------------------------------------------|-----------------------------------------------------------------------------------------|---------------------------------------------------------------------------------------|------------------------------------------------------------------------------|----------------------------------------------------------------------------------------|-----------------------------------------------------------------------------------------|---------------------------------------------------------------------------------------------------------|------------------------------------------------------------------------------------------------------|----------------------------------------------------------------------------------|--------------------------------------------------------------------------------------------------|-------------------------------------------------------------------------------------------------------------------|------------------------------------------------------------------------------------------------------------------------------------------------------------------|--------------------------------------------------------------------------------------------------------------|---------------------------------------------------------------------------------------------------------------------------------------------------|--------|
| Bolinder et al. 2012 (1) | Yes                                                                                                 | Yes                                                                                     | Yes                                                                                   | Yes                                                                          | Yes                                                                                    | Yes                                                                                     | Yes                                                                                                     | Yes                                                                                                  | Yes                                                                              | Yes                                                                                              | Yes                                                                                                               | Yes                                                                                                                                                              | Yes                                                                                                          | Yes                                                                                                                                               | Good   |
| Bolinder et al. 2014 (2) | Yes                                                                                                 | Yes                                                                                     | Yes                                                                                   | Yes                                                                          | Yes                                                                                    | Yes                                                                                     | Yes                                                                                                     | Yes                                                                                                  | NR                                                                               | Yes                                                                                              | Yes                                                                                                               | Yes                                                                                                                                                              | Yes                                                                                                          | Yes                                                                                                                                               | Good   |
| Blonde et al. (3)        | Yes                                                                                                 | Yes                                                                                     | Yes                                                                                   | Yes                                                                          | No                                                                                     | Yes                                                                                     | Yes                                                                                                     | Yes                                                                                                  | NR                                                                               | No                                                                                               | Yes                                                                                                               | No                                                                                                                                                               | No                                                                                                           | No                                                                                                                                                | Good   |
| Fadini et al. (4)        | Yes                                                                                                 | Yes                                                                                     | Yes                                                                                   | No                                                                           | Yes                                                                                    | Yes                                                                                     | Yes                                                                                                     | Yes                                                                                                  | Yes                                                                              | No                                                                                               | Yes                                                                                                               | Yes                                                                                                                                                              | No                                                                                                           | Yes                                                                                                                                               | Fair   |
| Inoue et al. (5)         | Yes                                                                                                 | Yes                                                                                     | Yes                                                                                   | No                                                                           | Yes                                                                                    | Yes                                                                                     | Yes                                                                                                     | Yes                                                                                                  | NR                                                                               | No                                                                                               | Yes                                                                                                               | Yes                                                                                                                                                              | Yes                                                                                                          | Yes                                                                                                                                               | Good   |
| Chehregosha et al. (6)   | Yes                                                                                                 | Yes                                                                                     | Yes                                                                                   | Yes                                                                          | Yes                                                                                    | Yes                                                                                     | No                                                                                                      | Yes                                                                                                  | Yes                                                                              | NR                                                                                               | Yes                                                                                                               | Yes                                                                                                                                                              | Yes                                                                                                          | Yes                                                                                                                                               | Good   |
| Lauritsen et al. (7)     | Yes                                                                                                 | NR                                                                                      | NR                                                                                    | Yes                                                                          | NR                                                                                     | NR                                                                                      | Yes                                                                                                     | NA                                                                                                   | Yes                                                                              | Yes                                                                                              | Yes                                                                                                               | No                                                                                                                                                               | Yes                                                                                                          | NA                                                                                                                                                | Poor   |

|                       |     |     |     |     |     |     |     |     |     |     |     |     |     |     |      |
|-----------------------|-----|-----|-----|-----|-----|-----|-----|-----|-----|-----|-----|-----|-----|-----|------|
| Horibe et al. (8)     | Yes | Yes | Yes | NR  | Yes | Yes | Yes | Yes | NR  | No  | Yes | Yes | Yes | Yes | Good |
| Brandt et al. (9)     | Yes | Yes | Yes | Yes | NR  | Yes | NR  | NR  | NR  | Yes | Yes | Yes | Yes | Yes | Fair |
| Nakaguchi et al. (10) | Yes | Yes | Yes | No  | Yes | Yes | Yes | Yes | NR  | Yes | Yes | Yes | Yes | Yes | Good |
| McCrimmon et al. (11) | Yes | NR  | Yes | Yes | Yes | Yes | Yes | Good |
| Kitazawa et al. (12)  | Yes | Yes | Yes | No  | NR  | Yes | Good |
| Wolf et al. (13)      | Yes | Yes | NR  | No  | NR  | Yes | Yes | Yes | NR  | Yes | Yes | Yes | Yes | Yes | Fair |
| Tsurutani et al. (14) | Yes | Yes | NR  | No  | No  | Yes | Yes | Yes | NR  | No  | Yes | Yes | Yes | Yes | Good |
| Zeng et al. (15)      | Yes | Yes | Yes | No  | No  | Yes | Yes | Yes | NR  | No  | Yes | NR  | No  | Yes | Fair |
| Kato et al. (16)      | Yes | NR  | NR  | No  | No  | No  | Yes | Yes | NR  | No  | Yes | No  | Yes | NR  | Fair |
| Shimizu et al. (17)   | Yes | Yes | NR  | No  | Yes | Yes | Yes | Yes | NR  | No  | Yes | Yes | Yes | NR  | Fair |
| Yamakage et al. (18)  | Yes | Yes | Yes | No  | Yes | Yes | Yes | Yes | NR  | No  | Yes | Yes | Yes | Yes | Good |
| Han et al. (19)       | Yes | Yes | Yes | No  | NR  | Yes | Yes | Yes | NR  | No  | Yes | Yes | Yes | NR  | Good |

**Table S2.** Changes in Visceral and Subcutaneous Adipose Tissue Following Treatment

| Study                  | Assessment method | Parameter                                             | SGLT2is            |                     | Control            |                    |
|------------------------|-------------------|-------------------------------------------------------|--------------------|---------------------|--------------------|--------------------|
|                        |                   |                                                       | Baseline value     | Change              | Baseline value     | Change             |
| Bolinder et al. (1)    | MRI               | Visceral adipose tissue volume (cm <sup>3</sup> )     | 3242.0             | -297.5              | 2798.2             | -39.2              |
|                        |                   | Subcutaneous adipose tissue volume (cm <sup>3</sup> ) | 4582.2             | -306.4              | 4679.3             | -121.4             |
| Inoue et al. (5)       | MRI               | Navel subcutaneous fat area (cm <sup>2</sup> )        | 334.9 ± 157.7      | -18.9 ± 15.7        | 315 ± 121.3        | 6.7 ± 14.1         |
|                        |                   | Navel visceral fat area (cm <sup>2</sup> )            | 138.8 ± 101.3      | -12.0 ± 12.7        | 122.7 ± 46.4       | 11.3 ± 11.5        |
|                        |                   | Iliopsoas muscle surface area (cm <sup>2</sup> )      | 20.6 ± 6.6         | -1.8 ± 1.3          | 21.2 ± 6.3         | -0.5 ± 1.2         |
| Horibe et al. (8)      | MRI               | Navel subcutaneous fat area (cm <sup>2</sup> )        | 341 (240.0, 417.0) | -35.0 (-68.0, 1.0)  | 311 (220.3, 411.5) | -3.5 (-27.0, 12.0) |
|                        |                   | Navel visceral fat area (cm <sup>2</sup> )            | 135 (10.40, 157.0) | -19.0 (-34.0, -2.0) | 133 (99.3, 170.8)  | -4.5 (-19.3, 12.8) |
| Chehregosha et al. (6) | DXA               | Visceral adipose tissue area (cm <sup>2</sup> )       | 178.9 ± 40.7       | -0.6                | 174.6 ± 52.5       | 11.6               |
| McCrimmon et al. (11)  | DXA               | Visceral fat mass (kg)                                | 1.5 ± 0.8          | -0.1                | 1.5 ± 0.8          | -0.2               |
| Kato et al. (16)       | BIA               | Visceral fat area (cm <sup>2</sup> )                  | 132.5 ± 50.5       | -10.6               | 131.7 ± 52.1       | -19.5              |
|                        |                   | Subcutaneous fat area (cm <sup>2</sup> )              | 253.8 ± 81.6       | -10.4               | 248.2 ± 94.2       | -14.3              |
| Zeng et al. (15)       | BIA               | Visceral fat mass (kg)                                | 2.9 ± 1.3          | -0.22 ± 0.1         | 3.1 ± 1.1          | -0.08 ± 0.1        |
|                        |                   | Subcutaneous fat mass (kg)                            | 17.9 ± 6.4         | -0.8 ± 0.31         | 19.4 ± 4.6         | -0.27 ± 0.35       |
| Shimizu et al. (17)    | BIA               | Visceral adipose tissue area (cm <sup>2</sup> )       | 108.7 ± 42.9       | -7.3                | 125.7 ± 32.2       | -5.7               |
|                        |                   | Subcutaneous adipose tissue area (cm <sup>2</sup> )   | 226.7 ± 90         | -11.2               | 249.5 ± 82.5       | 1.3                |
| Yamakage et al. (18)   | BIA               | Intra-abdominal fat area (cm <sup>2</sup> )           | 101.4 ± 28         | -9.8 (-17.7, -2.0)  | 110.5 ± 39.8       | 3.5 (-3.5, 10.5)   |
|                        |                   | Subcutaneous fat area (cm <sup>2</sup> )              | 254.4 ± 81         | -16.3 (-31.2, -1.4) | 223.8 ± 60.7       | 13.3 (-7.9, 34.5)  |
| Han et al. (19)        | CT scan           | Visceral fat area (cm <sup>2</sup> )                  | 209.1 ± 63.3       | -26.2 ± 3.7         | 223 ± 90.8         | 7 ± 7.7            |
|                        |                   | Subcutaneous fat area (cm <sup>2</sup> )              | 267.5 ± 115.4      | -9.3 ± 7.2          | 230.1 ± 80.6       | -1.4 ± 5.0         |

SGLT2is, sodium glucose cotransporter 2 inhibitors; MRI, magnetic resonance imaging; DXA, dual x-ray absorptiometry; BIA, Bioelectrical Impedance Analysis, CT scan, computed tomography scan

Data are presented as mean ± standard deviation or median (interquartile range) when available.

**Table S3.** Body Composition Changes Following Lifestyle Interventions and Bariatric Surgery in Previous Studies

| Study                | Design            | Intervention                                         | Absolute changes                    | %FFM change      |
|----------------------|-------------------|------------------------------------------------------|-------------------------------------|------------------|
| Nuijten et al. (20)  | Meta-analysis     | Bariatric surgery – 1 year                           | LBM: -8.13 kg [95%CI -7.26; -9.01]  | -23.4%           |
|                      |                   |                                                      | FFM: -8.23 kg [95%CI -5.73; -10.74] | -20.8%           |
|                      |                   |                                                      | SMM: -3.18 kg [95%CI -0.71; -5.64]  | -8.2%            |
| Chatson et al. (21)  | Systematic review | Dietary, behavioral and pharmaceutical interventions | TBW: -10 kg to -22.1 kg             | -4.3% to -38.3%  |
|                      |                   | bariatric surgery                                    | TBW: -12.3 kg to -60.4              | -12.7% to -52.7% |
| Turicchi et al. (22) | Randomized trial  | Low-calorie diet – 8 weeks                           | TBW: -11.17 ± 3.52                  | -30.37%          |

LBM, lean body mass; FFM, fat-free mass; SMM, skeletal muscle mass  
%FFM: relative to total weight loss

## References

1. Bolinder J, Ljunggren Ö, Kullberg J, Johansson L, Wilding J, Langkilde AM, et al. Effects of dapagliflozin on body weight, total fat mass, and regional adipose tissue distribution in patients with type 2 diabetes mellitus with inadequate glycemic control on metformin. *The Journal of clinical endocrinology and metabolism*. 2012;97(3):1020-31.
2. Bolinder J, Ljunggren Ö, Johansson L, Wilding J, Langkilde AM, Sjöström CD, et al. Dapagliflozin maintains glycaemic control while reducing weight and body fat mass over 2 years in patients with type 2 diabetes mellitus inadequately controlled on metformin. *Diabetes, obesity & metabolism*. 2014;16(2):159-69.
3. Blonde L, Stenlöf K, Fung A, Xie J, Canovatchel W, Meininger G. Effects of canagliflozin on body weight and body composition in patients with type 2 diabetes over 104 weeks. *Postgraduate medicine*. 2016;128(4):371-80.
4. Fadini GP, Bonora BM, Zatti G, Vitturi N, Iori E, Marescotti MC, et al. Effects of the SGLT2 inhibitor dapagliflozin on HDL cholesterol, particle size, and cholesterol efflux capacity in patients with type 2 diabetes: a randomized placebo-controlled trial. *Cardiovascular diabetology*. 2017;16(1):42.
5. Inoue H, Morino K, Ugi S, Tanaka-Mizuno S, Fuse K, Miyazawa I, et al. Ipragliflozin, a sodium-glucose cotransporter 2 inhibitor, reduces bodyweight and fat mass, but not muscle mass, in Japanese type 2 diabetes patients treated with insulin: A randomized clinical trial. *Journal of diabetes investigation*. 2019;10(4):1012-21.
6. Chehrehgosha H, Sohrabi MR, Ismail-Beigi F, Malek M, Reza Babaei M, Zamani F, et al. Empagliflozin Improves Liver Steatosis and Fibrosis in Patients with Non-Alcoholic Fatty Liver Disease and Type 2 Diabetes: A Randomized, Double-Blind, Placebo-Controlled Clinical Trial. *Diabetes therapy : research, treatment and education of diabetes and related disorders*. 2021;12(3):843-61.
7. Lauritsen KM, Nielsen BRR, Tolbod LP, Johannsen M, Hansen J, Hansen TK, et al. SGLT2 Inhibition Does Not Affect Myocardial Fatty Acid Oxidation or Uptake, but Reduces Myocardial

Glucose Uptake and Blood Flow in Individuals With Type 2 Diabetes: A Randomized Double-Blind, Placebo-Controlled Crossover Trial. *Diabetes*. 2021;70(3):800-8.

8. Horibe K, Morino K, Miyazawa I, Tanaka-Mizuno S, Kondo K, Sato D, et al. Metabolic changes induced by dapagliflozin, an SGLT2 inhibitor, in Japanese patients with type 2 diabetes treated by oral anti-diabetic agents: A randomized, clinical trial. *Diabetes research and clinical practice*. 2022;186:109781.

9. Brandt-Jacobsen NH, Jürgens M, Hasbak P, Gaede P, Rossing P, Rasmussen JJ, et al. Reduction of cardiac adipose tissue volume with short-term empagliflozin treatment in patients with type 2 diabetes: A substudy from the SIMPLE randomized clinical trial. *Diabetes, obesity & metabolism*. 2023;25(3):844-55.

10. Nakaguchi H, Kondo Y, Kyohara M, Konishi H, Oiwa K, Terauchi Y. Effects of liraglutide and empagliflozin added to insulin therapy in patients with type 2 diabetes: A randomized controlled study. *Journal of diabetes investigation*. 2020;11(6):1542-50.

11. McCrimmon RJ, Catarig AM, Frias JP, Lausvig NL, le Roux CW, Thielke D, et al. Effects of once-weekly semaglutide vs once-daily canagliflozin on body composition in type 2 diabetes: a substudy of the SUSTAIN 8 randomised controlled clinical trial. *Diabetologia*. 2020;63(3):473-85.

12. Kitazawa T, Seino H, Ohashi H, Inazawa T, Inoue M, Ai M, et al. Comparison of tofogliflozin versus glimepiride as the third oral agent added to metformin plus a dipeptidyl peptidase-4 inhibitor in Japanese patients with type 2 diabetes: A randomized, 24-week, open-label, controlled trial (STOP-OB). *Diabetes, obesity & metabolism*. 2020;22(9):1659-63.

13. Wolf VLW, Breder I, de Carvalho LSF, Soares AAS, Cintra RM, Barreto J, et al. Dapagliflozin increases the lean-to total mass ratio in type 2 diabetes mellitus. *Nutrition & diabetes*. 2021;11(1):17.

14. Tsurutani Y, Nakai K, Inoue K, Azuma K, Mukai S, Maruyama S, et al. Comparative study of the effects of ipragliflozin and sitagliptin on multiple metabolic variables in Japanese patients with type 2 diabetes: A multicentre, randomized, prospective, open-label, active-controlled study. *Diabetes, obesity & metabolism*. 2018;20(11):2675-9.

15. Zeng YH, Liu SC, Lee CC, Sun FJ, Liu JJ. Effect of empagliflozin versus linagliptin on body composition in Asian patients with type 2 diabetes treated with premixed insulin. *Scientific reports*. 2022;12(1):17065.

16. Kato K, Suzuki K, Aoki C, Sagara M, Niitani T, Wakamatsu S, et al. The effects of intermittent use of the SGLT-2 inhibitor, dapagliflozin, in overweight patients with type 2 diabetes in Japan: a randomized, crossover, controlled clinical trial. *Expert opinion on pharmacotherapy*. 2017;18(8):743-51.

17. Shimizu M, Suzuki K, Kato K, Jojima T, Iijima T, Murohisa T, et al. Evaluation of the effects of dapagliflozin, a sodium-glucose co-transporter-2 inhibitor, on hepatic steatosis and fibrosis using transient elastography in patients with type 2 diabetes and non-alcoholic fatty liver disease. 2019;21(2):285-92.

18. Yamakage H, Tanaka M, Inoue T, Odori S, Kusakabe T, Satoh-Asahara N. Effects of dapagliflozin on the serum levels of fibroblast growth factor 21 and myokines and muscle mass in Japanese patients with type 2 diabetes: A randomized, controlled trial. *Journal of diabetes investigation*. 2020;11(3):653-61.

19. Han E, Lee YH, Lee BW, Kang ES, Cha BS. Ipragliflozin Additively Ameliorates Non-Alcoholic Fatty Liver Disease in Patients with Type 2 Diabetes Controlled with Metformin and Pioglitazone: A 24-Week Randomized Controlled Trial. *Journal of clinical medicine*. 2020;9(1).

20. Nuijten MAH, Eijsvogels TMH, Montpellier VM, Janssen IMC, Hazebroek EJ, Hopman MTE. The magnitude and progress of lean body mass, fat-free mass, and skeletal muscle mass loss following bariatric surgery: A systematic review and meta-analysis. *Obes Rev*. 2022;23(1):e13370.

21. Chaston TB, Dixon JB, O'Brien PE. Changes in fat-free mass during significant weight loss: a systematic review. *International Journal of Obesity*. 2007;31(5):743-50.

22. Turicchi J, O'Driscoll R, Finlayson G, Duarte C, Hopkins M, Martins N, et al. Associations between the proportion of fat-free mass loss during weight loss, changes in appetite, and subsequent weight change: results from a randomized 2-stage dietary intervention trial. *The American journal of clinical nutrition*. 2020;111(3):536-44.
